# Supplementary material
Source: PubMed Central journal article supplement (PMC2899685)

Figure 2E

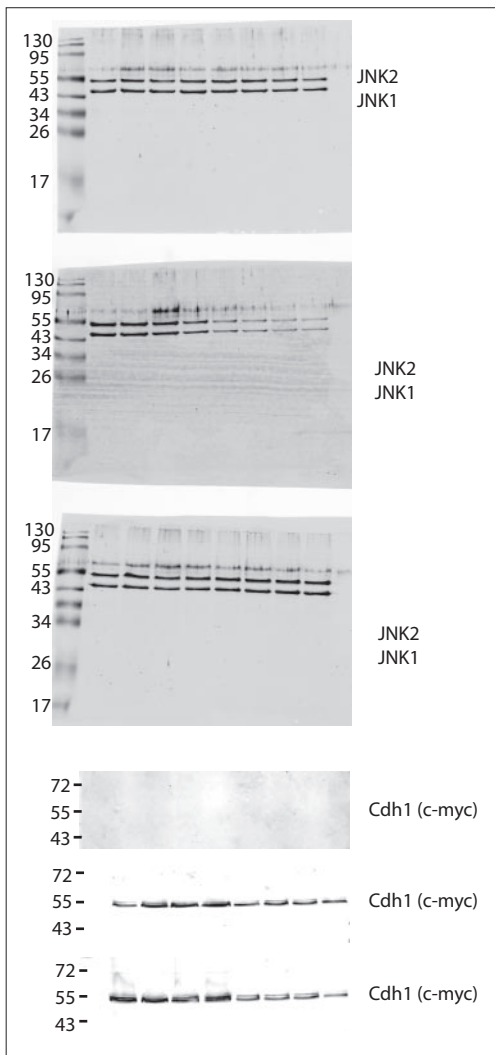

Figure 2F

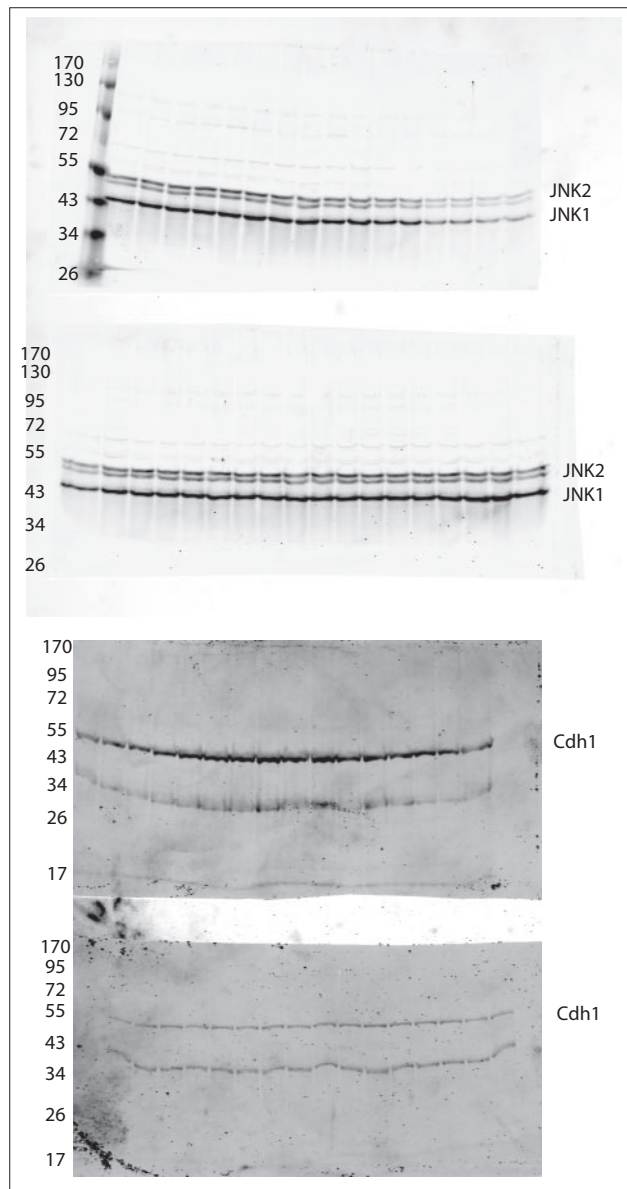

Figure 2G

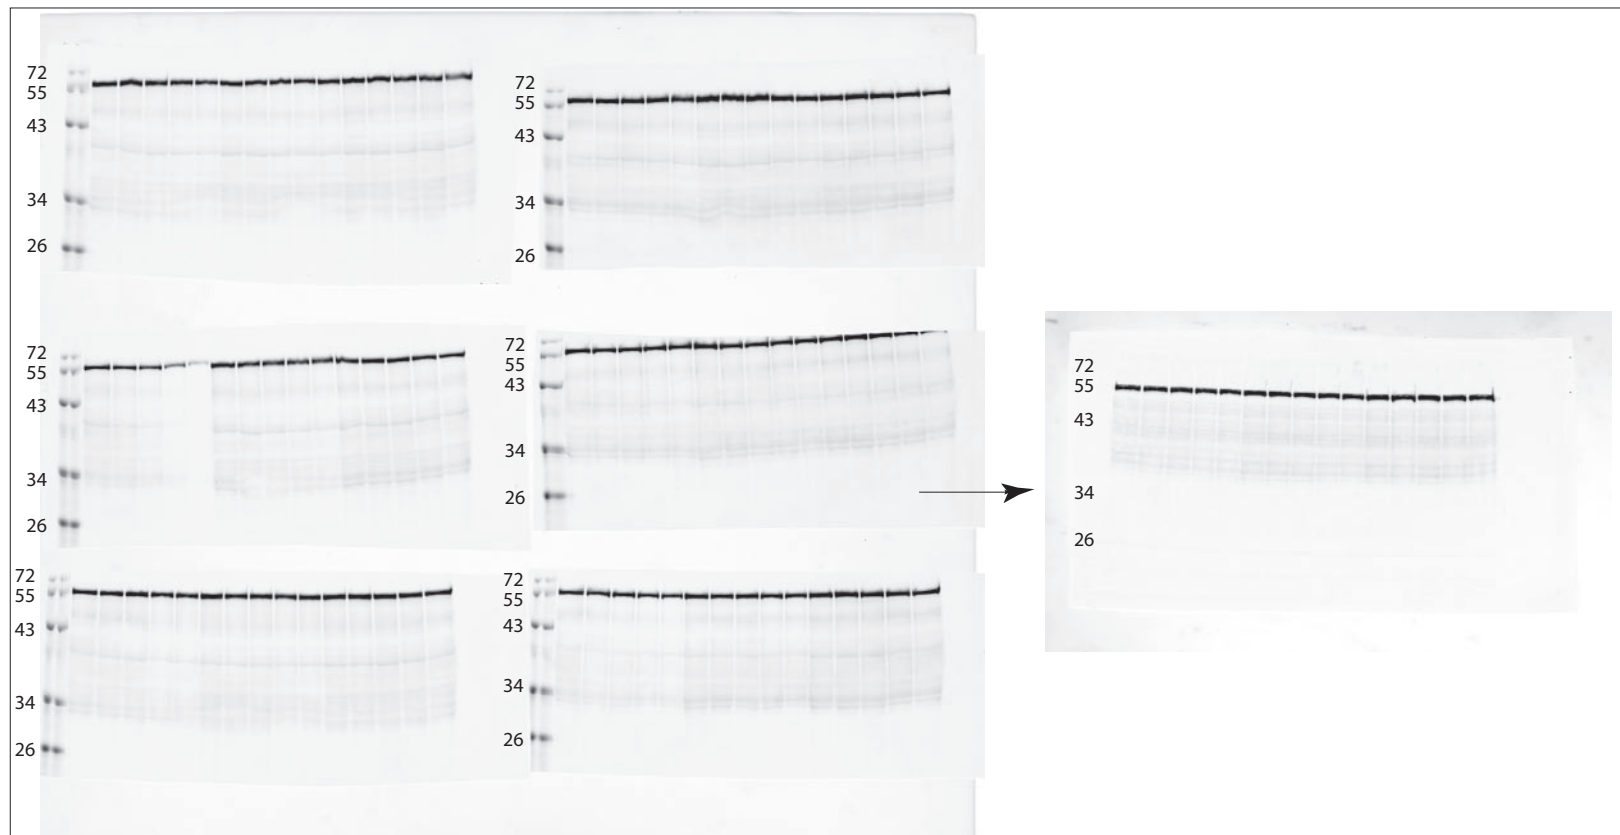

Supplement: NIHMS210960-supplement-10.pdf [file NIHMS210960-supplement-10.pdf]

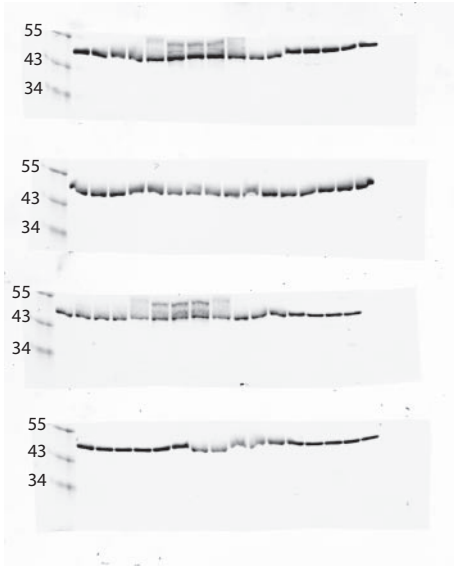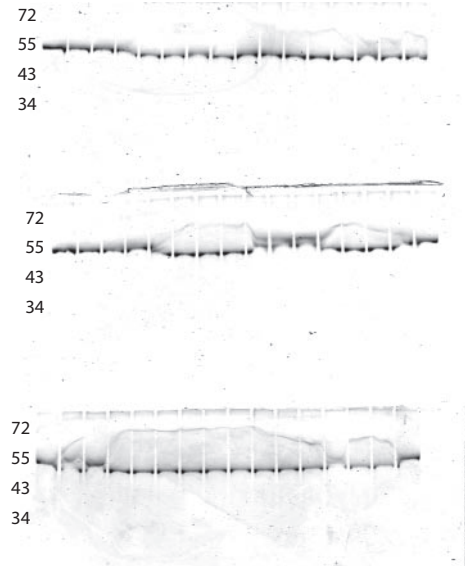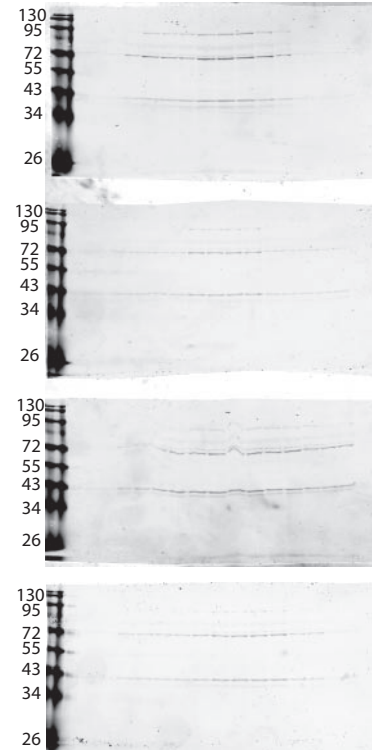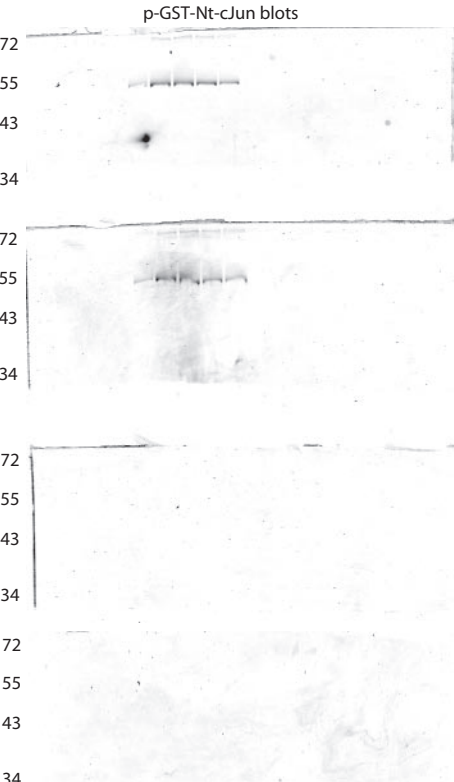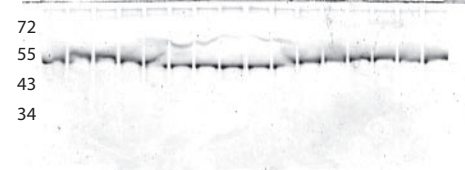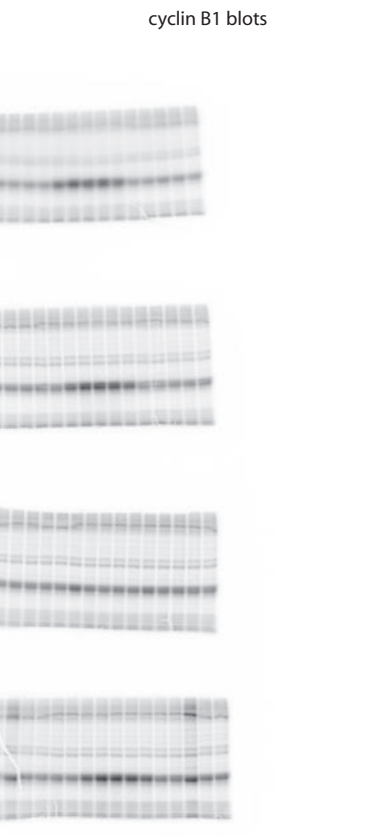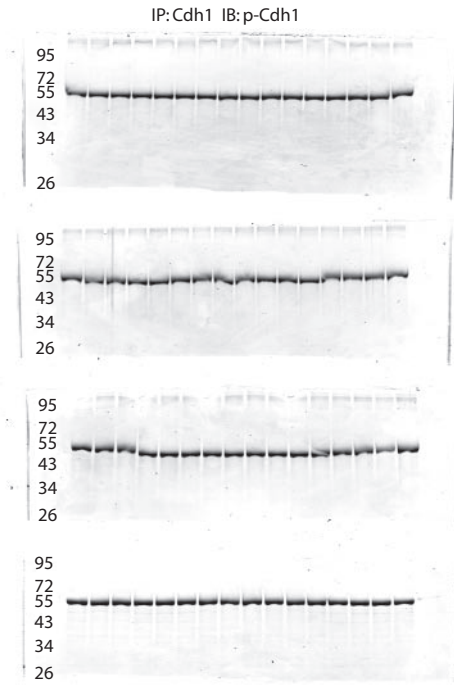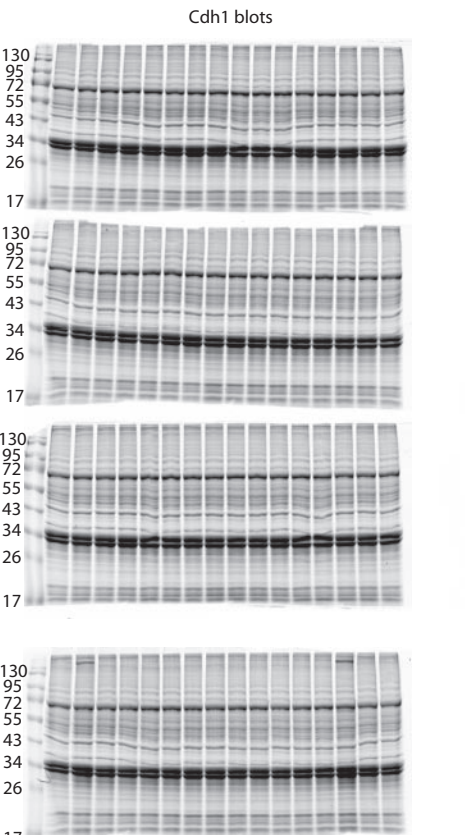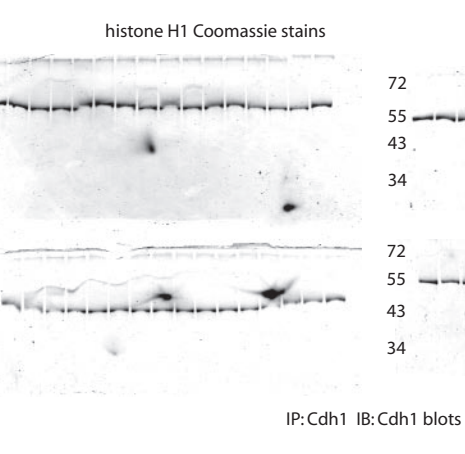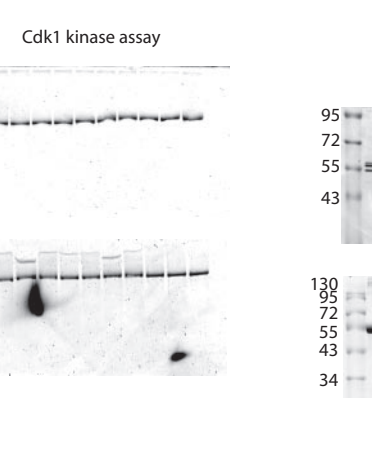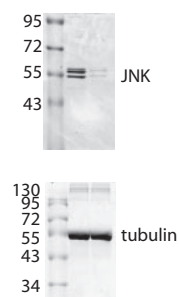

tubulin blots

Full scanned original images for Figures 5B

Gutierrez GJ et al.

Figure S7 continued

Supplement: NIHMS210960-supplement-12.pdf [file NIHMS210960-supplement-12.pdf]

Figure 5A

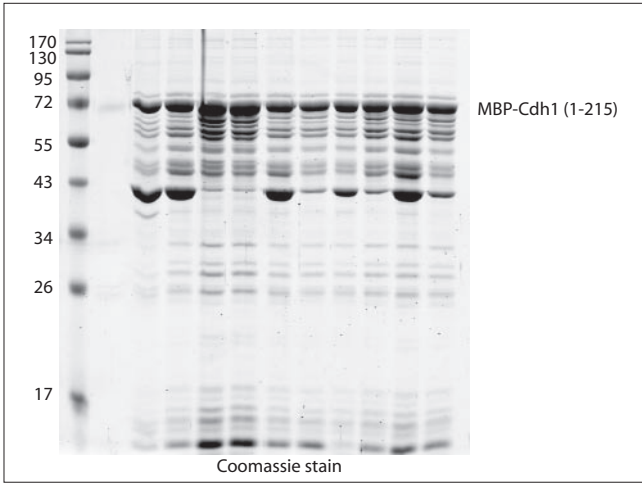

Figure 5F

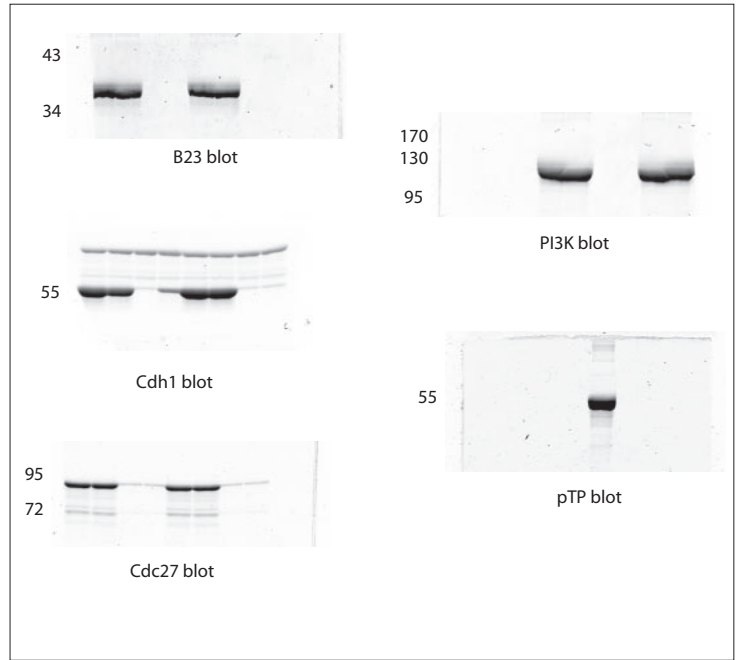

Figure 5D

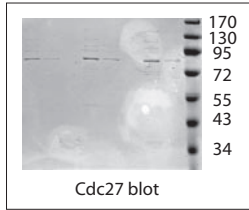

Figure 6D

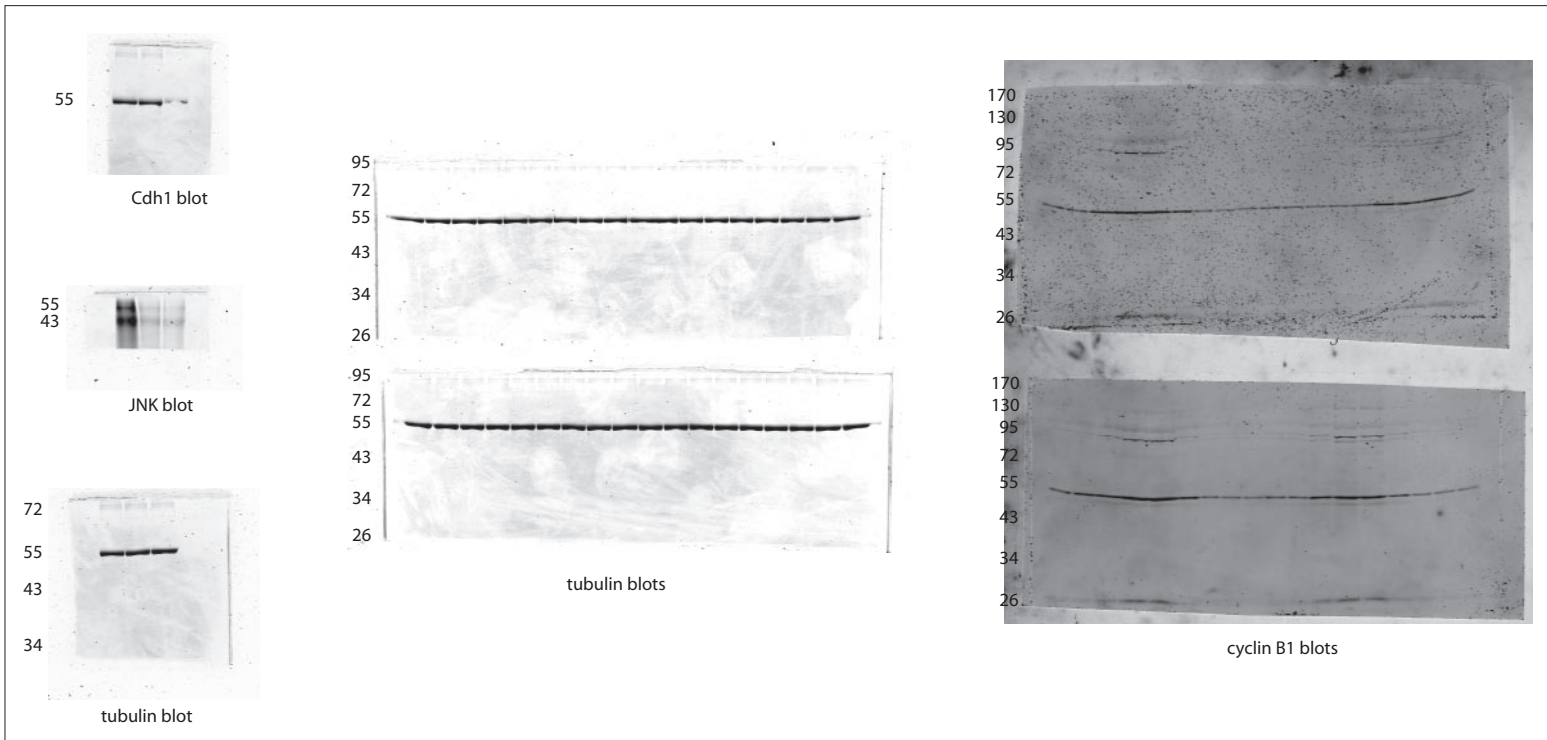

Supplement: NIHMS210960-supplement-13.pdf [file NIHMS210960-supplement-13.pdf]

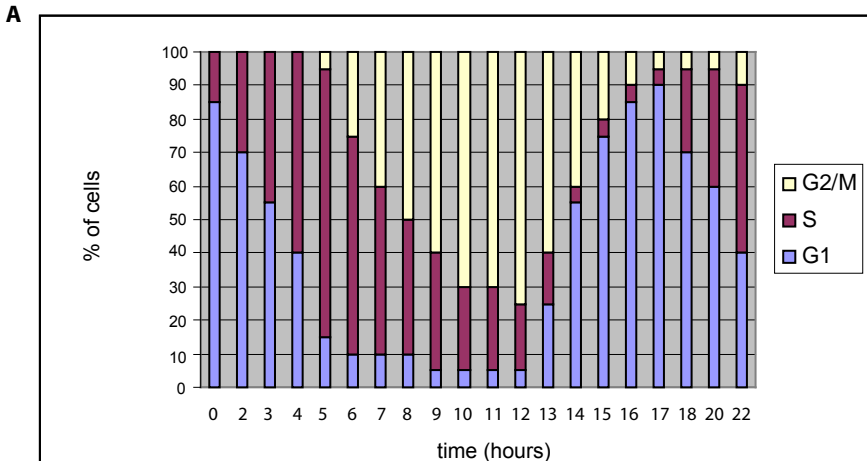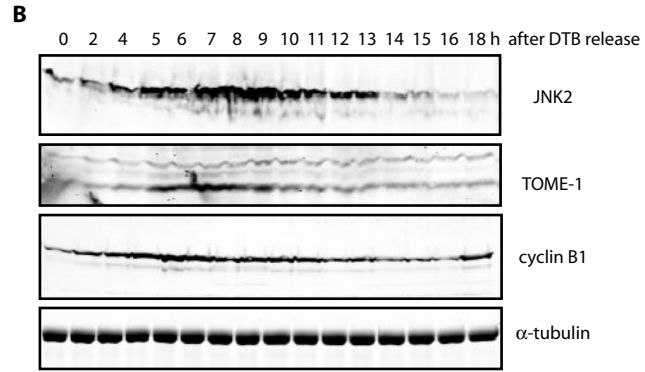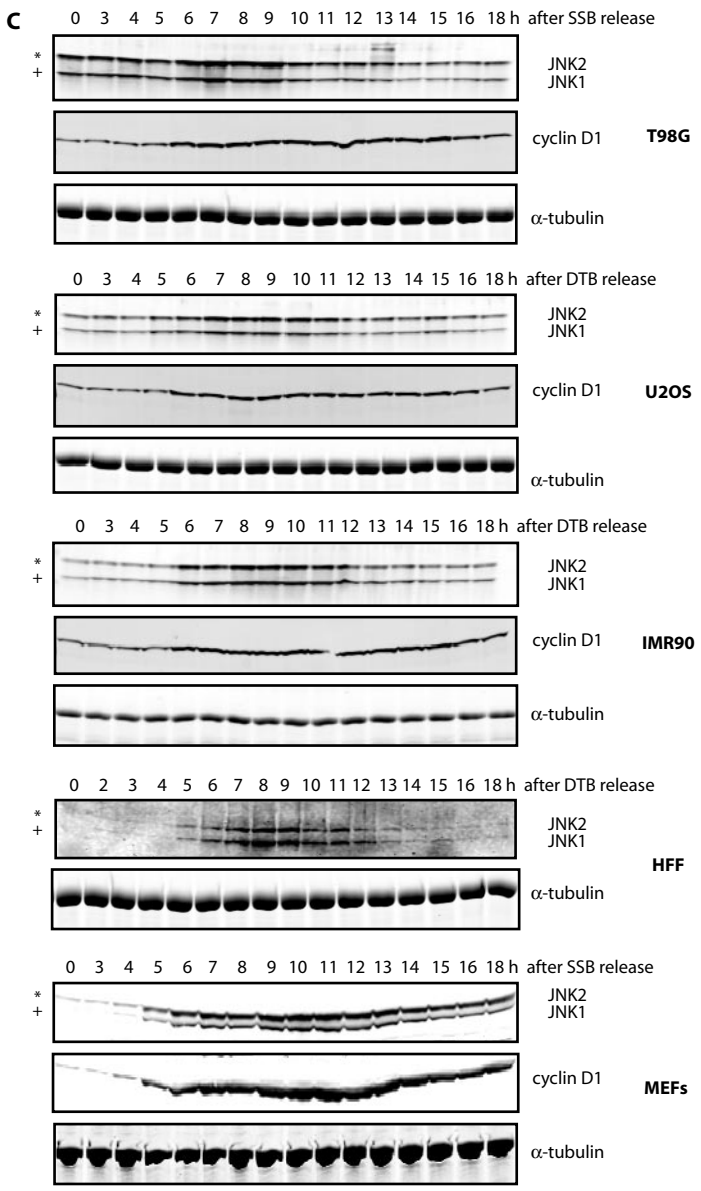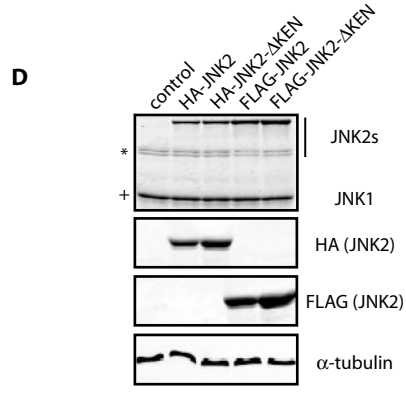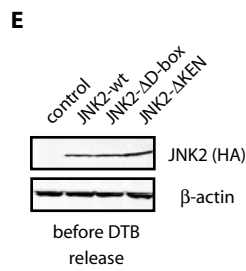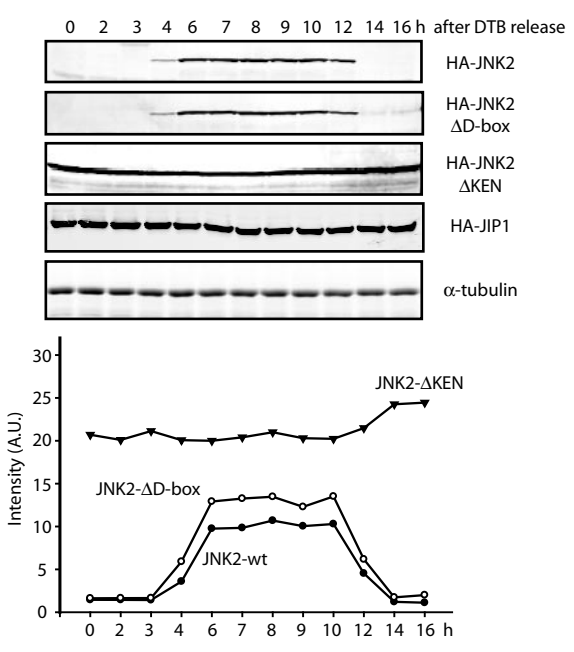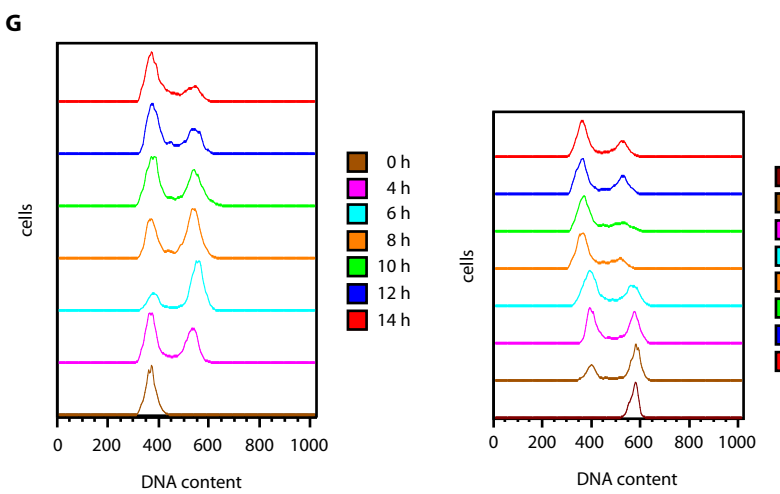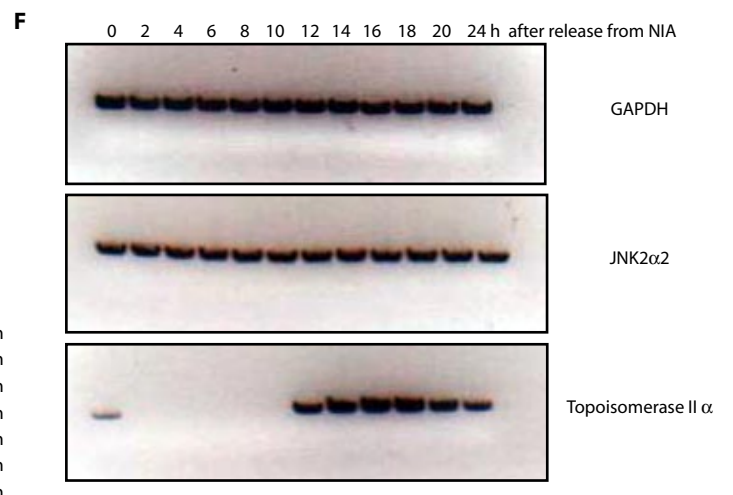

Supplement: NIHMS210960-supplement-3.pdf [file NIHMS210960-supplement-3.pdf]

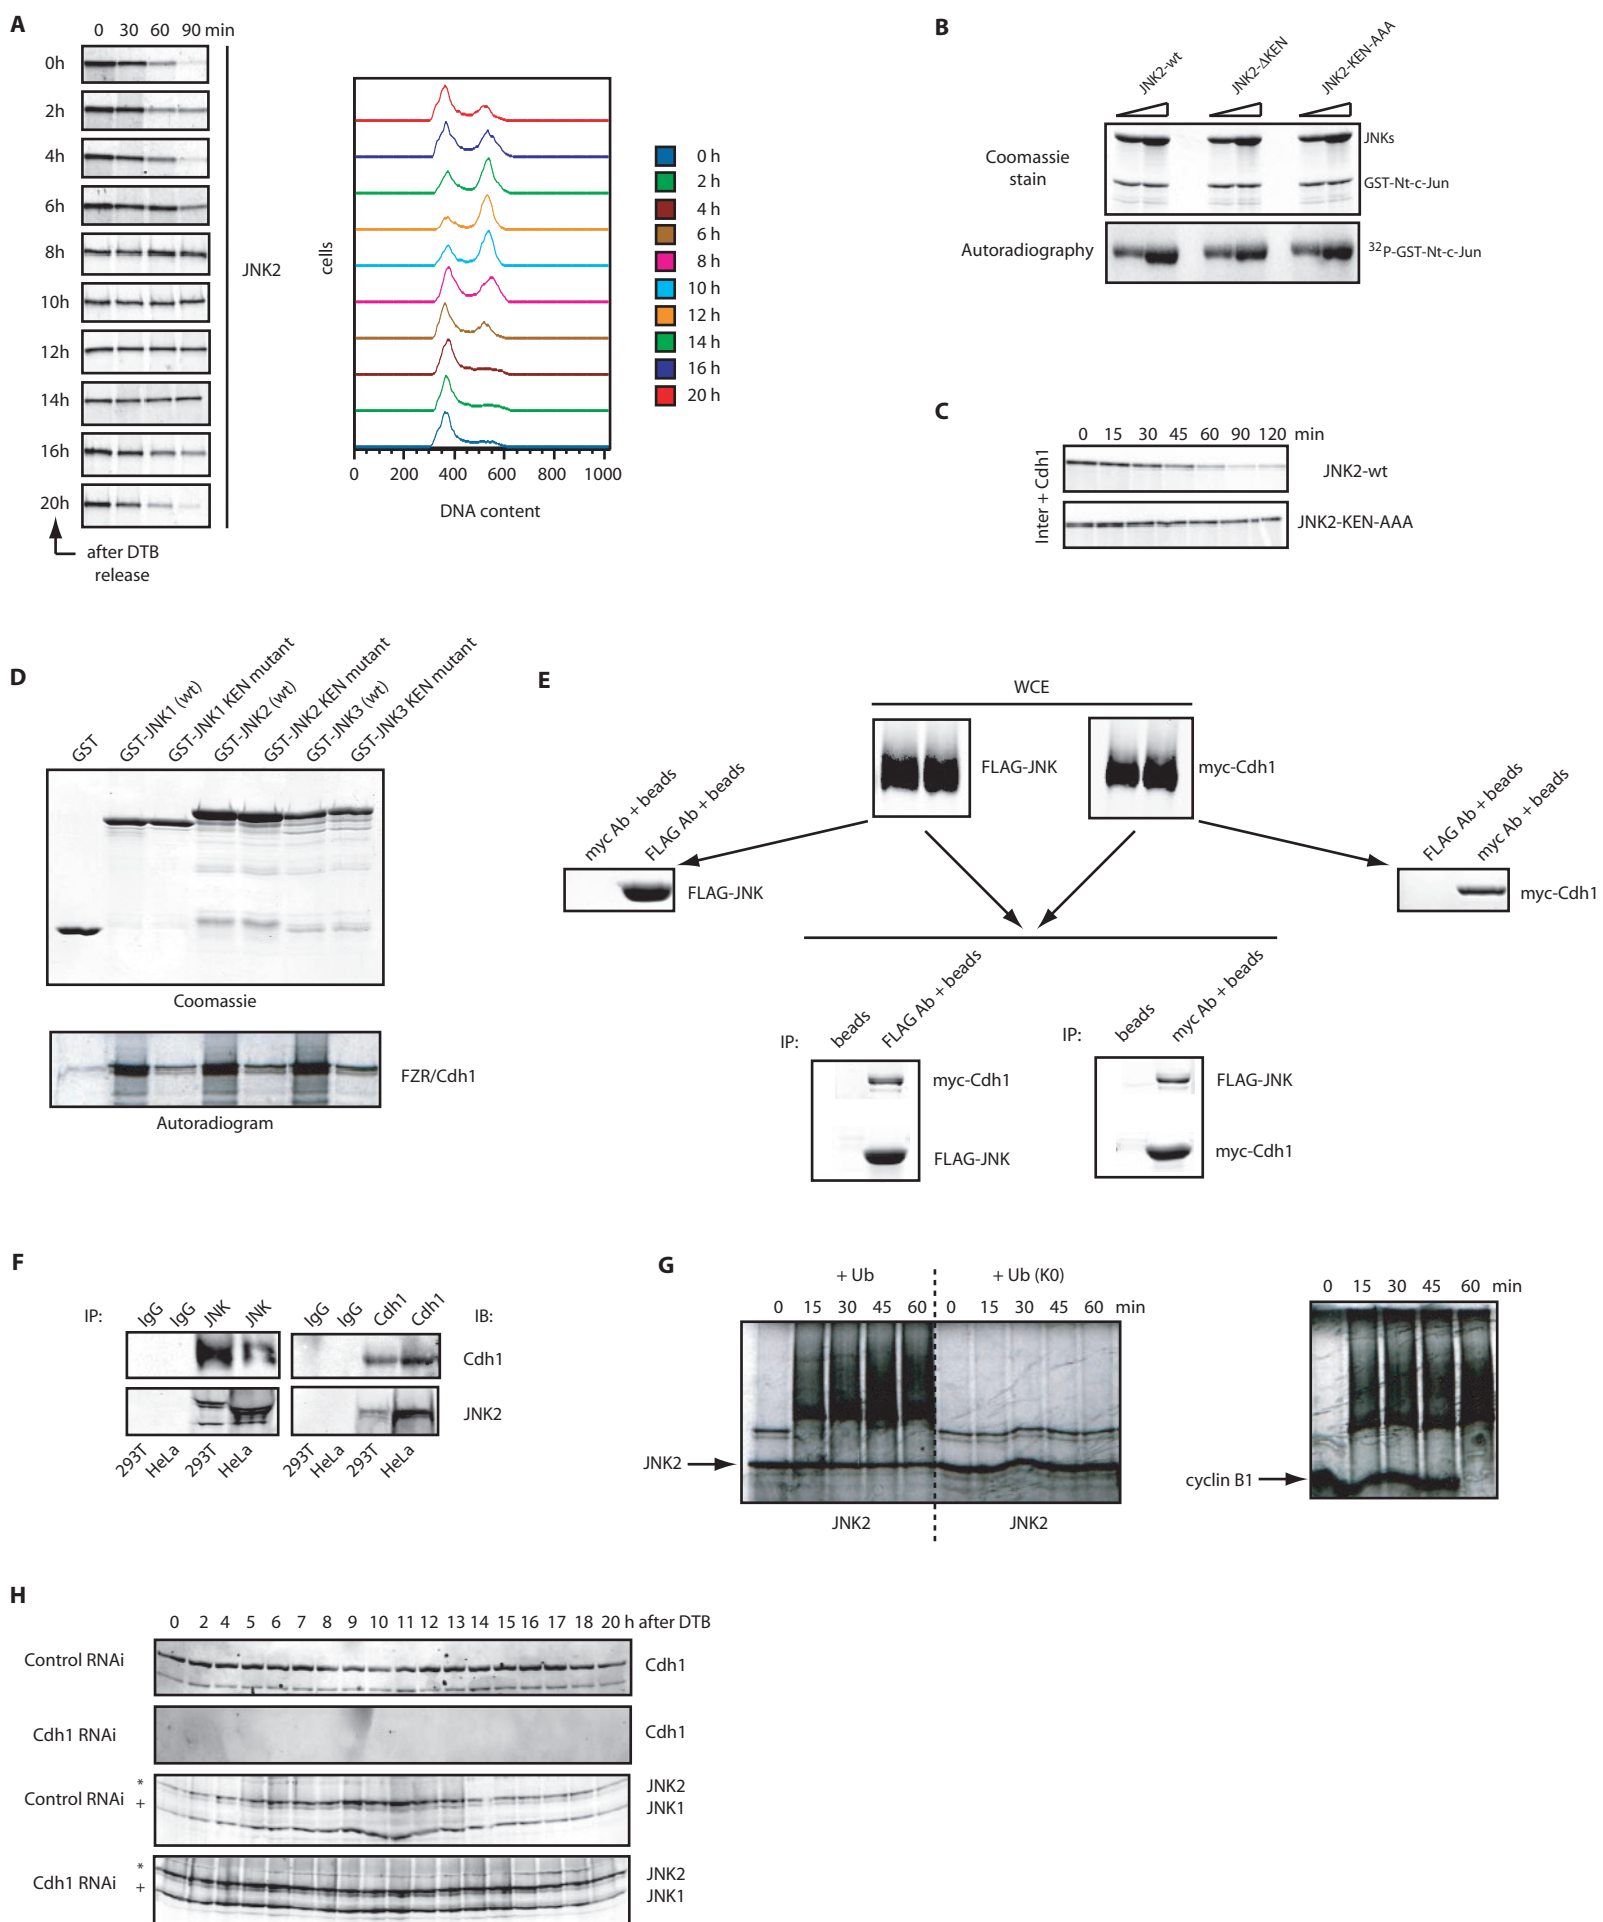

Supplement: NIHMS210960-supplement-4.pdf [file NIHMS210960-supplement-4.pdf]

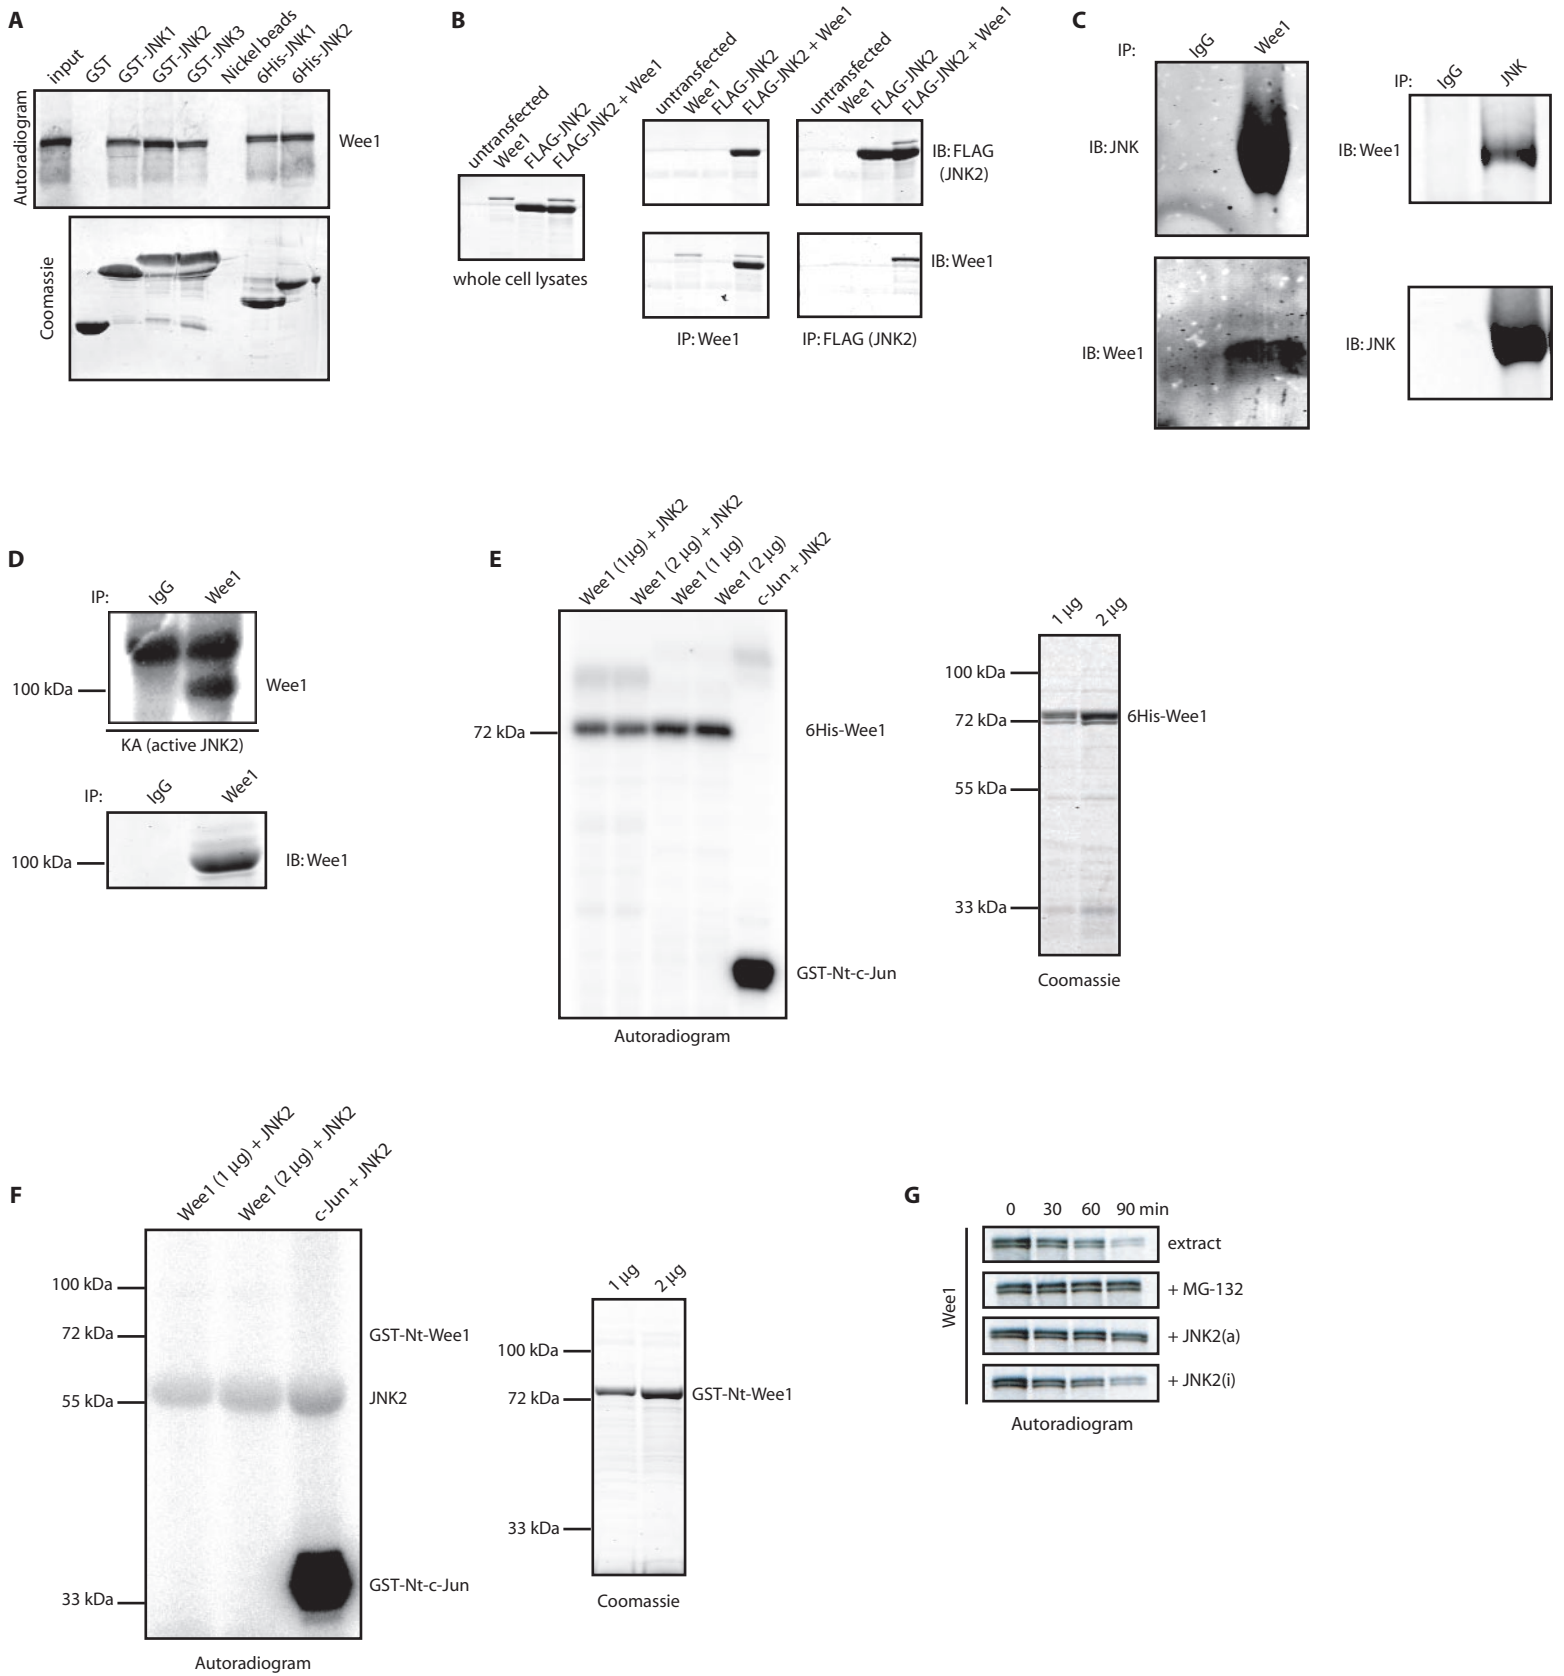

Supplement: NIHMS210960-supplement-7.pdf [file NIHMS210960-supplement-7.pdf]

Figure 1B

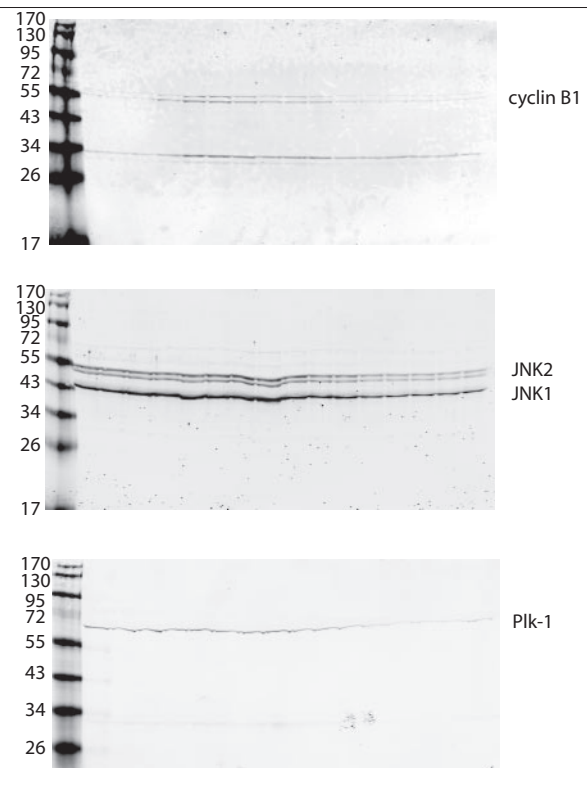

Figure 1C

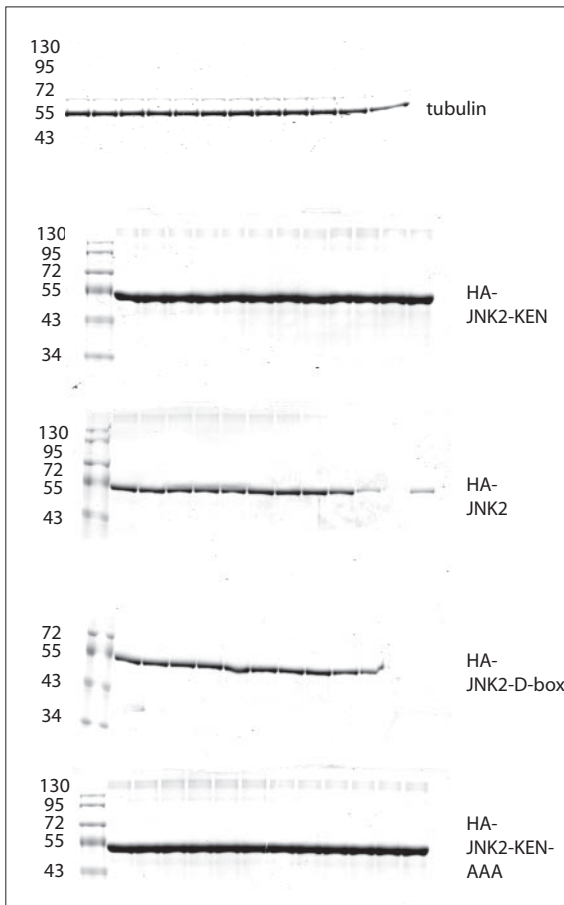

Figure 2B

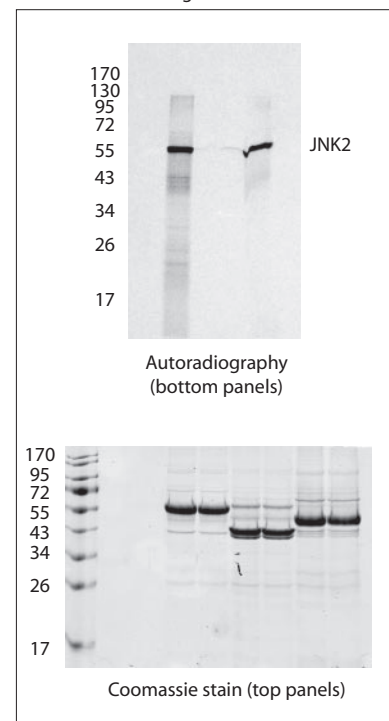

Figure 2C

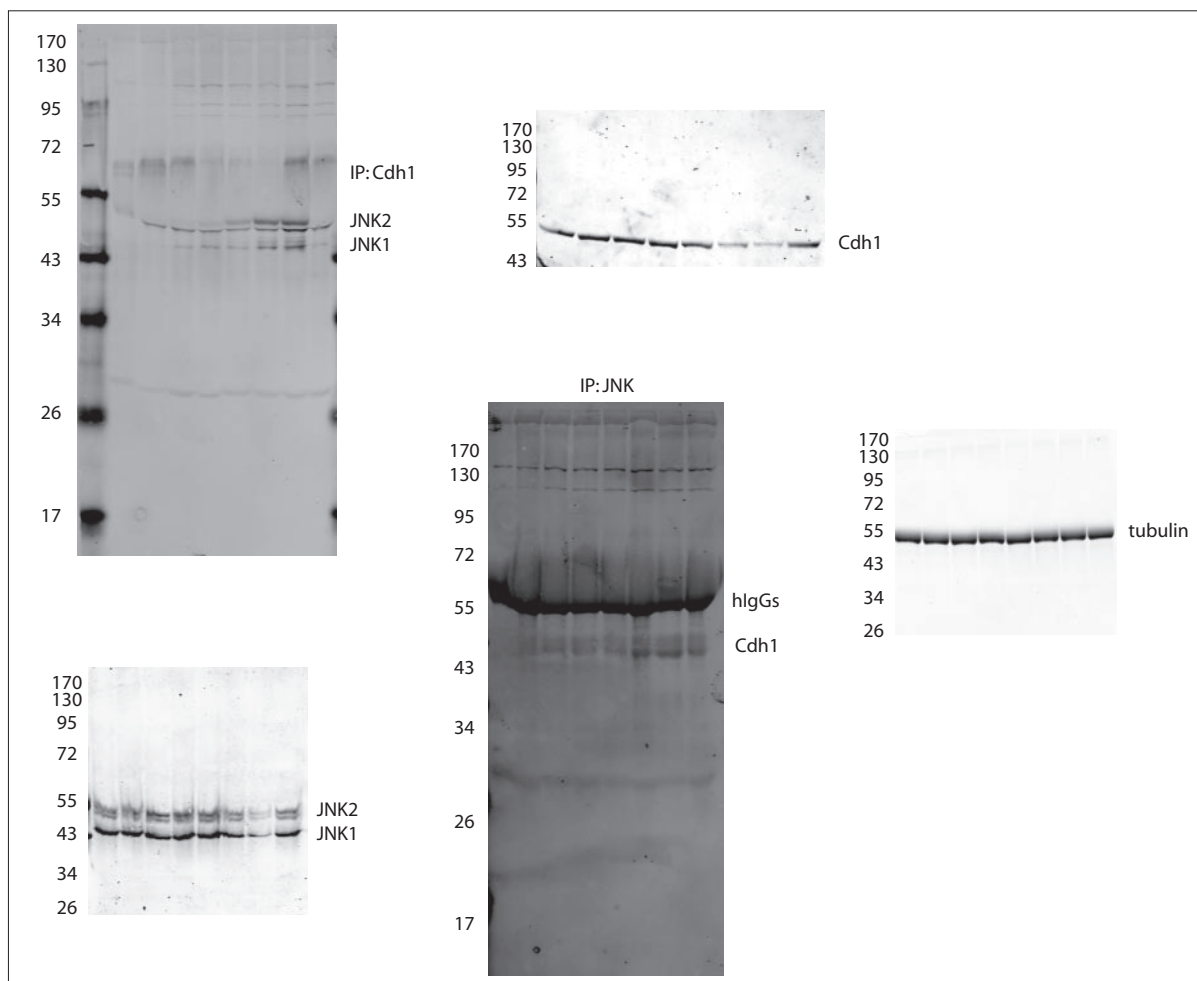

Supplement: NIHMS210960-supplement-9.pdf [file NIHMS210960-supplement-9.pdf]
